# Supplementary material for: Direct transformation of ReO3 nanorods into ReS2 nanosheets on carbon fibres for modulating solid–gas interactions
Source: Royal Society of Chemistry journal article supplement (doi:10.1039/d2ce00079b), 2022-01-01
Supplement: d2ce00079b1.pdf [file d2ce00079b1.pdf]

## Electronic Supplementary Information (ESI)

### **Direct transformation of ReO<sub>3</sub> nanorods into ReS<sub>2</sub> nanosheets on carbon fibres for modulating solid-gas interactions**

Song Hee Lee<sup>ad</sup>, Noeul Kim<sup>bd</sup>, Ji Hwan Jeong<sup>c</sup>, Bo-Hye Kim<sup>c</sup>, Hak Ki Yu<sup>b,\*</sup>, and Myung Hwa Kim<sup>a,\*</sup>

<sup>a</sup> Department of Chemistry & Nano Science, Ewha Womans University, Seoul 03760, Republic of Korea

<sup>b</sup> Department of Materials Science and Engineering & Department of Energy Systems Research, Ajou University, Suwon 16499, Republic of Korea.

<sup>c</sup> Department of Science Education, Chemistry Education Major, Daegu University, 201 Daegudae-ro, Gyeongsan-si, Gyeongsangbuk-do, 712-714, Korea.

<sup>d</sup> These authors contributed equally to this work as first authors

\* Corresponding Authors: [hakkiyu@ajou.ac.kr](mailto:hakkiyu@ajou.ac.kr) (H. K. Yu) and [myungkim@ewha.ac.kr](mailto:myungkim@ewha.ac.kr) (M. H. Kim)

**Figure S1**

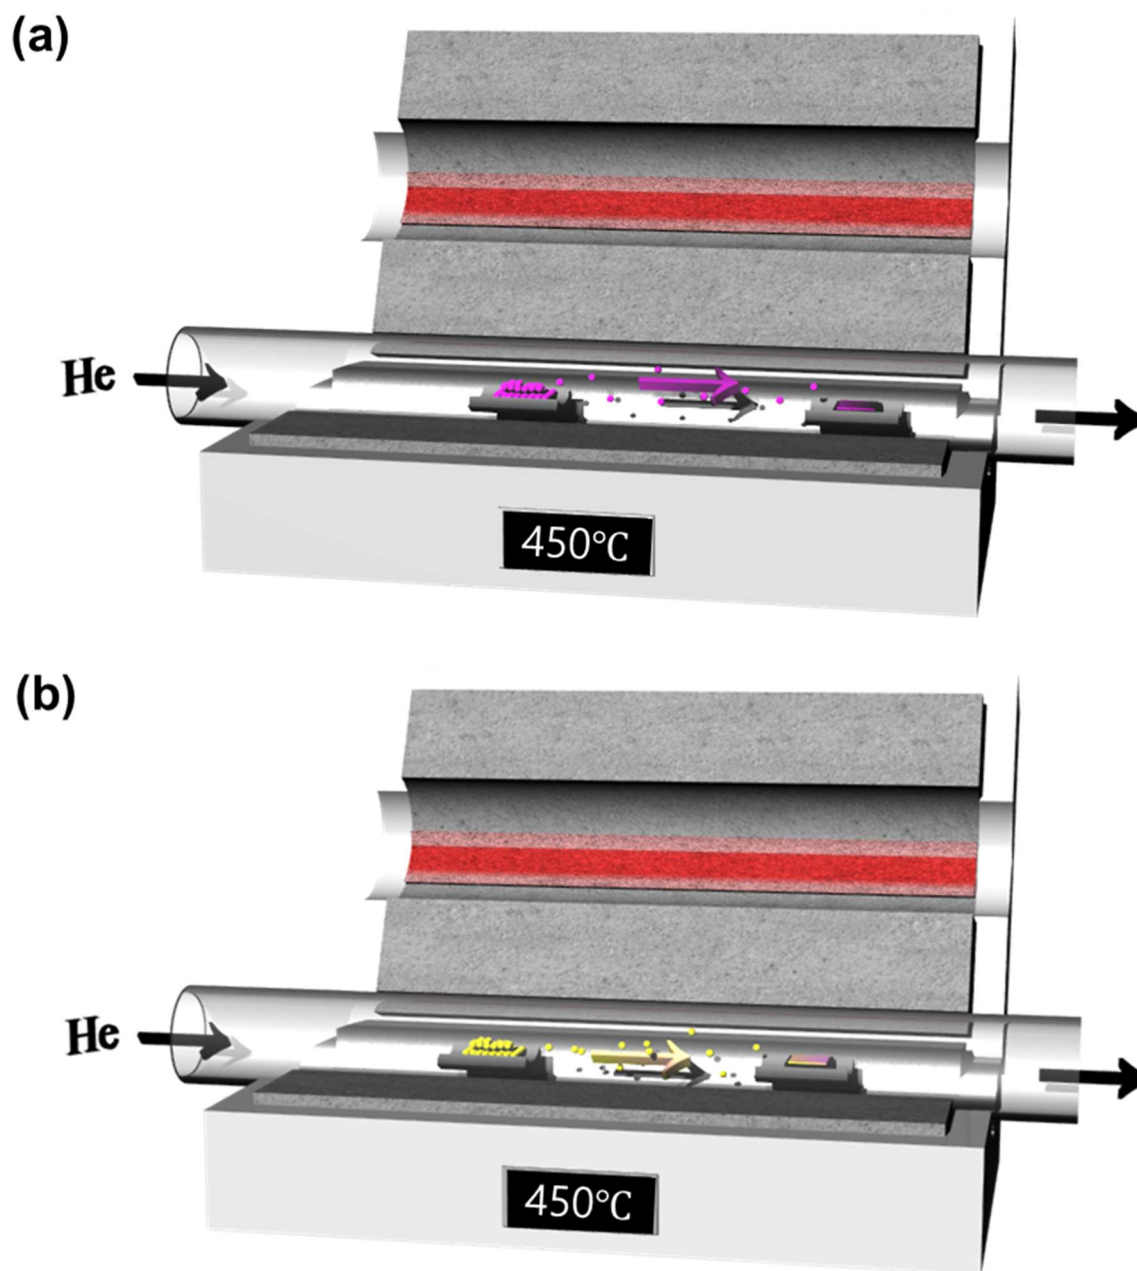

**Figure S1.** Schematic illustration of (a)  $\text{ReO}_3$  and (b)  $\text{ReS}_2$

Figure S2 (a)

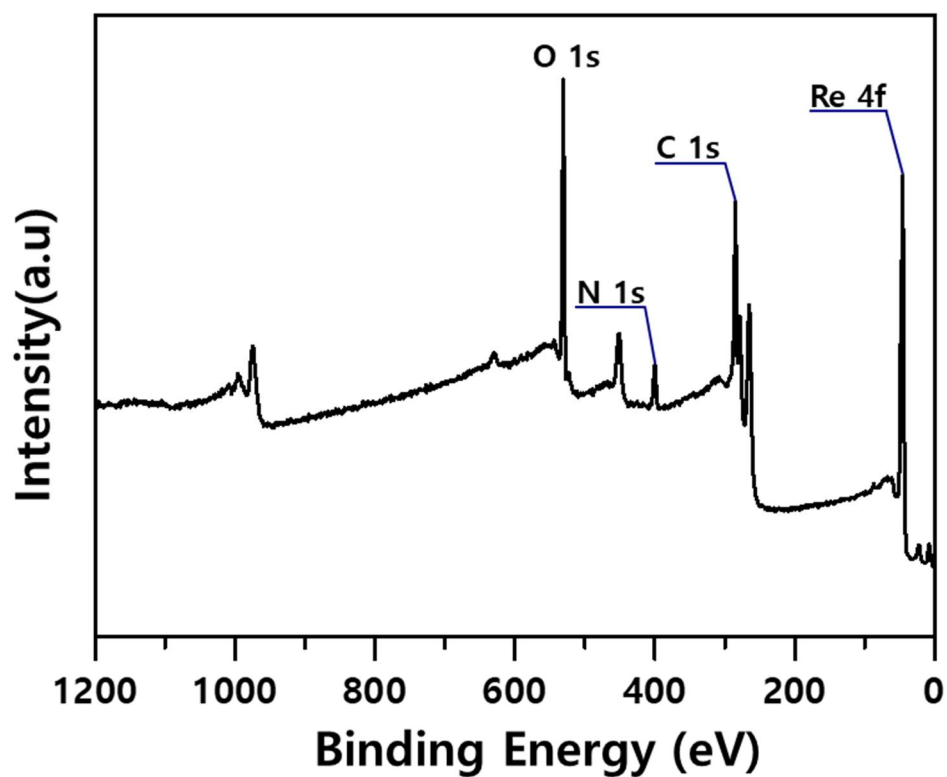

| Name | Start BE(eV) | Peak BE(eV) | End BE(eV) | Height(CPS) | FWHM(eV) | Area(CPS.eV) | Atomic(%) |
|------|--------------|-------------|------------|-------------|----------|--------------|-----------|
| C1s  | 291.18       | 284.6       | 282.68     | 46884.91    | 1.92     | 106083.4     | 47.06     |
| N1s  | 405.48       | 400.32      | 395.98     | 8809.87     | 3.92     | 36481.07     | 9.55      |
| O1s  | 535.88       | 531.05      | 527.48     | 76730.33    | 1.96     | 183265.6     | 31.84     |
| Re4f | 52.28        | 45.74       | 40.28      | 100118.7    | 1.55     | 321572.9     | 11.55     |

**Figure S2 (a)** X-ray photoelectron survey spectrum for the  $\text{ReO}_3$  nanorods grown at  $450^\circ\text{C}$  under He 250 sccm for 1h.

**Figure S2 (b)**

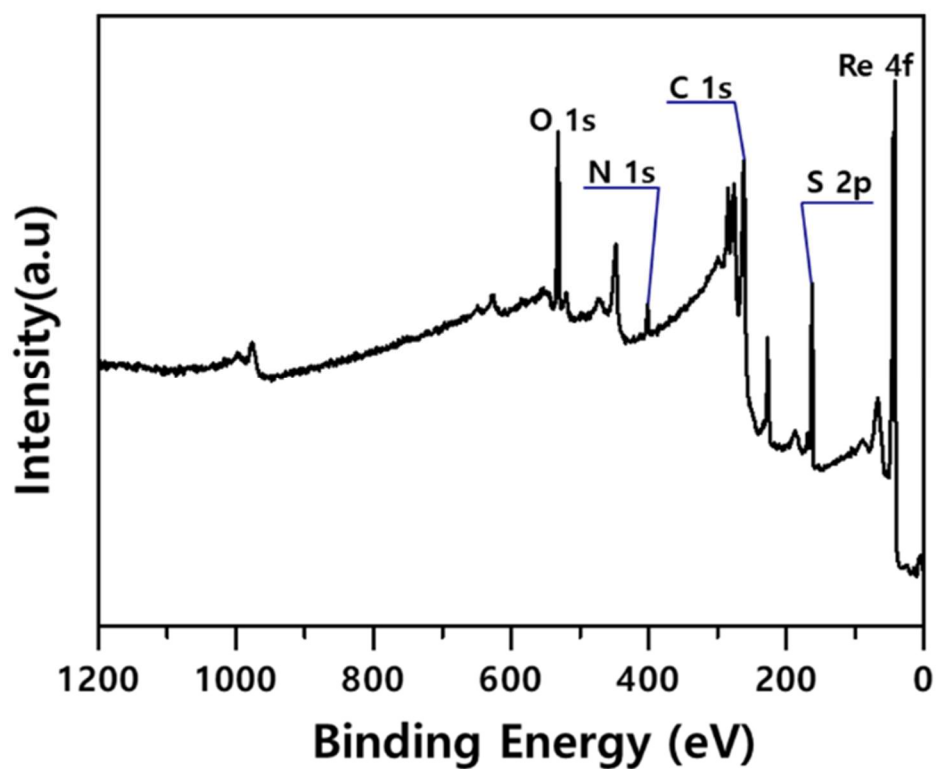

| Name | Start BE (eV) | Peak BE (eV) | End BE (eV) | Height(CPS) | FWHM(eV) | Area(CPS.eV) | Atomic(%) |
|------|---------------|--------------|-------------|-------------|----------|--------------|-----------|
| C1s  | 290.48        | 284.6        | 282.28      | 16131.41    | 1.66     | 36152.67     | 21.17     |
| N1s  | 405.18        | 402.04       | 397.68      | 7338.37     | 1.58     | 15296.21     | 5.29      |
| O1s  | 536.88        | 531.95       | 528.58      | 39362.39    | 2.35     | 101574.1     | 23.31     |
| Re4f | 50.58         | 42.22        | 38.98       | 164419.5    | 0.92     | 375003.2     | 17.75     |
| S2p  | 172.38        | 162.69       | 159.38      | 43456.74    | 1.97     | 98120.86     | 32.47     |

**Figure S2 (b)** X-ray photoelectron survey spectrum for the  $\text{ReS}_2$  nanosheets grown at  $500^\circ\text{C}$  under He 10 sccm for 20 minutes.

**Table S1**

| Measurement | Atomic % |          | Atomic ratio |
|-------------|----------|----------|--------------|
|             | Re       | S        | Re:S         |
| XPS         | 35.35    | 64.65    | 1:1.83       |
| SEM-EDX     | 33.09918 | 66.90082 | 1:2.02       |

**Table S1** Atomic percent of  $\text{ReS}_2$  nanosheets estimated by XPS and SEM-EDX measurement at 49 different spots.
